# Supplementary material
Source: Springer Nature journal article supplement (https://www.springermedizin.de/resource/supplementary/12874_2009_383_MOESM9_ESM.pdf/9434358)

Number of original articles/1 million population/year

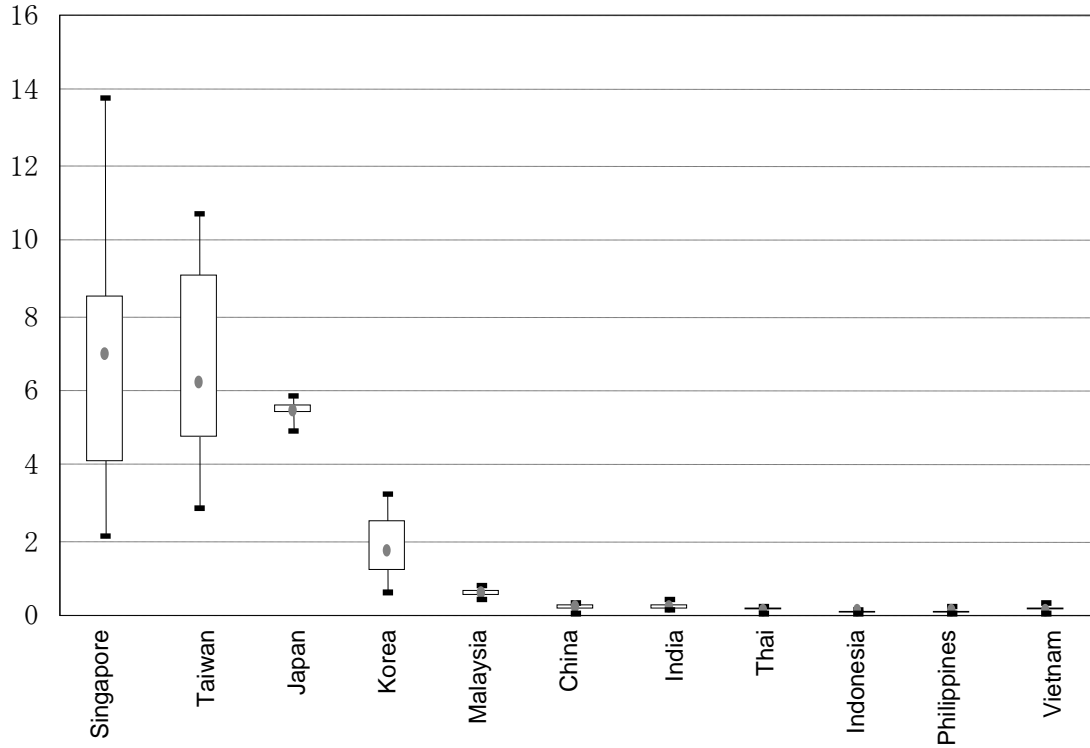

Supplement: MOESM9 [file 9434358]
